# Supplementary material for: Spatial distribution and functional integration of displaced retinal ganglion cells
Source: Springer Nature journal article supplement (doi:10.1038/s41598-025-91045-5), 2025-02-28
Supplement: MOESM1 [file 41598_2025_91045_MOESM1_ESM.pdf]

Supplementary Information, related to Figure 4

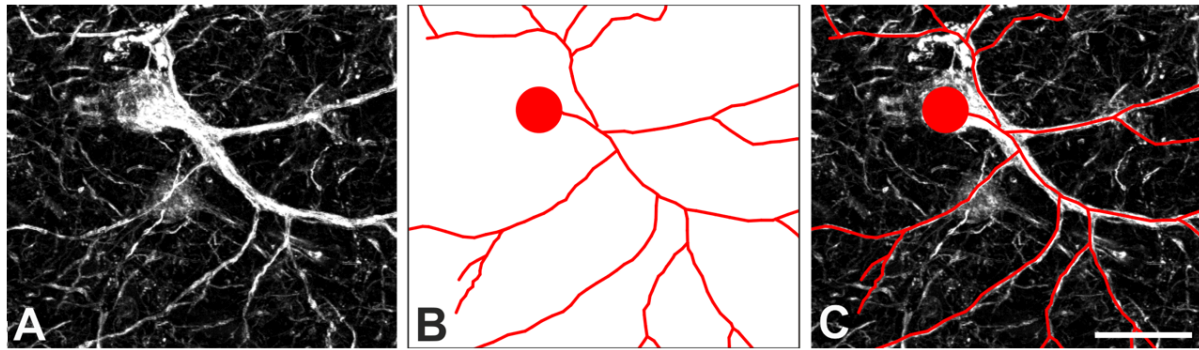

**Figure S1: SMI-32 labeling and tracing of a displaced M4/sONa cell.**

**A:** Maximum intensity projection of a confocal image stack of whole-mounted retina labeled against SMI-32. The projection includes parts of the inner nuclear layer and most of the inner plexiform layer. **B:** Tracing of the cell body and primary dendrites of the displaced M4/sONa cell from Fig.4A-C. **C:** Overlay. Scale bar: 25  $\mu\text{m}$ .
